# Supplementary material for: Development of a tool to assess oral health-related quality of life in patients hospitalised in critical care
Source: Springer Nature journal article supplement (doi:10.1007/s11136-019-02335-1), 2019-10-26
Supplement: MOESM2 [file 17310972]

CCU-OHQoL items: frequency of endorsement.

|                                                                                                                                                    | <b>Dissatisfied</b> | <b>Somewhat dissatisfied</b>              | <b>Neither Satisfied nor dissatisfied</b> | <b>Somewhat satisfied</b>             | <b>Satisfied</b>            |
|----------------------------------------------------------------------------------------------------------------------------------------------------|---------------------|-------------------------------------------|-------------------------------------------|---------------------------------------|-----------------------------|
|                                                                                                                                                    | <b>n (%)</b>        | <b>n (%)</b>                              | <b>n (%)</b>                              | <b>n (%)</b>                          | <b>n (%)</b>                |
| 3. How dissatisfied or satisfied have you been with the health of your teeth or mouth?                                                             | 2 (4.4)             | 6 (13.3)                                  | 22 (48.9)                                 | 7 (15.6)                              | 8 (17.8)                    |
|                                                                                                                                                    | <b>Not at all</b>   | <b>Slightly bothered</b>                  | <b>Moderately bothered</b>                | <b>Very bothered</b>                  | <b>Extremely bothered</b>   |
| 4. How bothered have you been by having trouble biting or chewing any kinds of food?                                                               | 30 (69.8)           | 5 (11.6)                                  | 4 (9.3)                                   | 3 (7.0)                               | 1 (2.2)                     |
| 5. How bothered have you been by your teeth or dentures preventing you from speaking the way you want?                                             | 35 (77.8)           | 5 (11.1)                                  | 2 (4.4)                                   | 2 (4.4)                               | 1 (2.2)                     |
|                                                                                                                                                    | <b>Not at all</b>   | <b>Slightly difficult</b>                 | <b>Moderately difficult</b>               | <b>Very difficult</b>                 | <b>Extremely difficult</b>  |
| 6. How difficult did you find it to swallow comfortably?                                                                                           | 23 (51.1)           | 11 (24.4)                                 | 3 (6.7)                                   | 4 (8.9)                               | 4 (8.9)                     |
|                                                                                                                                                    | <b>Not at all</b>   | <b>A little</b>                           | <b>Somewhat</b>                           | <b>A fair amount</b>                  | <b>A great deal</b>         |
| 7. How much have you felt that your sense of taste has worsened because of problems with your mouth, teeth, gums or dentures?                      | 22 (50)             | 9 (20.5)                                  | 11 (25)                                   |                                       | 2(4.5)                      |
|                                                                                                                                                    | <b>Unhappy</b>      | <b>Somewhat unhappy</b>                   | <b>Neither happy nor unhappy</b>          | <b>Somewhat happy</b>                 | <b>Happy</b>                |
| 8. How happy were you with your ability to taste your food?                                                                                        | 7 (16.3)            | 3 (7.0)                                   | 13 (30.2)                                 | 4 (9.3)                               | 16 (37.2)                   |
|                                                                                                                                                    | <b>Not at all</b>   | <b>Slightly bothered</b>                  | <b>Moderately bothered</b>                | <b>Very bothered</b>                  | <b>Extremely bothered</b>   |
| 9. How bothered were you by pain in your mouth, teeth or gums?                                                                                     | 31 (68.9)           | 4 (8.9)                                   | 3 (6.7)                                   | 4 (8.9)                               | 3 (6.7)                     |
| 10. How bothered have you been by having to seek help from your nurse or visitors to relieve pain or discomfort from your mouth, teeth or gums?    | 39 (86.7)           | 1 (2.2)                                   | 1 (2.2)                                   | 2 (4.4)                               | 2 (4.4)                     |
|                                                                                                                                                    | <b>Dissatisfied</b> | <b>Somewhat dissatisfied</b>              | <b>Neither Satisfied nor dissatisfied</b> | <b>Somewhat satisfied</b>             | <b>Satisfied</b>            |
| 11. How satisfied were you with how moist your mouth feels?                                                                                        | 10 (22.3)           | 13 (28.9)                                 | 10 (22.2)                                 | 5 (11.1)                              | 7 (15.6)                    |
|                                                                                                                                                    | <b>Not at all</b>   | <b>Slightly bothered</b>                  | <b>Moderately bothered</b>                | <b>Very bothered</b>                  | <b>Extremely bothered</b>   |
| 12. How bothered have you been about dryness of your mouth?                                                                                        | 6 (13.3)            | 13 (28.9)                                 | 11 (24.4)                                 | 7 (15.6)                              | 8 (17.8)                    |
| 13. How bothered have you been by having bad breath?                                                                                               | 16(35.6)            | 15 (33.3)                                 | 8 (17.8)                                  | 4 (8.9)                               | 2 (4.4)                     |
|                                                                                                                                                    | <b>Not at all</b>   | <b>A little</b>                           | <b>Somewhat</b>                           | <b>A fair amount</b>                  | <b>A great deal</b>         |
| 14. How much has the condition of your mouth affected your contacts with members of the hospital staff or visitors (i.e. family and friends)?      | 27 (60)             | 8 (17.8)                                  | 7 (15.6)                                  | 1 (2.2)                               | 2 (4.4)                     |
|                                                                                                                                                    | <b>Not at all</b>   | <b>Slightly difficult</b>                 | <b>Moderately difficult</b>               | <b>Very difficult</b>                 | <b>Extremely difficult</b>  |
| 15. How difficult it was for you or the hospital staff to be able to brush your teeth properly because of problems with your mouth, teeth or gums? | 24 (54.4)           | 9 (20.5)                                  | 6 (13.6)                                  | 4 (9.1)                               | 1 (2.3)                     |
|                                                                                                                                                    | <b>Dissatisfied</b> | <b>Somewhat dissatisfied</b>              | <b>Neither Satisfied nor dissatisfied</b> | <b>Somewhat satisfied</b>             | <b>Satisfied</b>            |
| 16. How satisfied were you with how frequently you were able to brush your teeth compared to your home routine?                                    | 7 (15.6)            | 14 (31.1)                                 | 11 (24.4)                                 | 5 (11.1)                              | 8 (17.8)                    |
|                                                                                                                                                    | <b>Not at all</b>   | <b>Slightly anxious or self-conscious</b> | <b>Moderately anxious ...</b>             | <b>Very anxious or self-conscious</b> | <b>Extremely anxious...</b> |

|                                                                                                              |           |           |          |         |         |
|--------------------------------------------------------------------------------------------------------------|-----------|-----------|----------|---------|---------|
| 17. How anxious or self-conscious did you feel because of problems with your mouth, teeth, gums or dentures? | 22 (48.9) | 15 (33.3) | 5 (11.1) | 1 (2.2) | 2 (4.4) |
|--------------------------------------------------------------------------------------------------------------|-----------|-----------|----------|---------|---------|
