# Supplementary material for: Development of a tool to assess oral health-related quality of life in patients hospitalised in critical care
Source: Springer Nature journal article supplement (doi:10.1007/s11136-019-02335-1), 2019-10-26
Supplement: MOESM3 [file 17310972]

Item-total correlation and Cronbach's alpha if item deleted.

|                                                                                                                                                    | Corrected Item-Total Correlation | Cronbach's Alpha if Item Deleted |
|----------------------------------------------------------------------------------------------------------------------------------------------------|----------------------------------|----------------------------------|
| <b>Satisfaction with oral health</b>                                                                                                               |                                  |                                  |
| 3. How dissatisfied or satisfied have you been with the health of your teeth or mouth?                                                             | .151                             | .733                             |
| <b>Functional limitation</b>                                                                                                                       |                                  |                                  |
| 4. How bothered have you been by having trouble biting or chewing any kinds of food?                                                               | .459                             | .702                             |
| 5. How bothered have you been by your teeth or dentures preventing you from speaking the way you want?                                             | .453                             | .705                             |
| 6. How difficult did you find it to swallow comfortably?                                                                                           | .534                             | .690                             |
| 7. How much have you felt that your sense of taste has worsened because of problems with your mouth, teeth, gums or dentures?                      | .541                             | .696                             |
| 8. How happy were you with your ability to taste your food?                                                                                        | .340                             | .720                             |
| <b>Oral Symptoms</b>                                                                                                                               |                                  |                                  |
| 9. How bothered were you by pain in your mouth, teeth or gums?                                                                                     | .450                             | .698                             |
| 10. How bothered have you been by having to seek help from your nurse or visitors to relieve pain or discomfort from your mouth, teeth or gums?    | .452                             | .702                             |
| 11. How satisfied were you with how moist your mouth feels?                                                                                        | .347                             | .714                             |
| 12. How bothered have you been about dryness of your mouth?                                                                                        | .597                             | .685                             |
| 13. How bothered have you been by having bad breath?                                                                                               | .379                             | .707                             |
| <b>Social impact</b>                                                                                                                               |                                  |                                  |
| 14. How much has the condition of your mouth affected your contacts with members of the hospital staff or visitors (i.e. family and friends)?      | .324                             | .713                             |
| <b>Self-care</b>                                                                                                                                   |                                  |                                  |
| 15. How difficult it was for you or the hospital staff to be able to brush your teeth properly because of problems with your mouth, teeth or gums? | .687                             | .684                             |
| 16. How satisfied were you with how frequently you were able to brush your teeth compared to your home routine?                                    | -.078                            | .779                             |
| <b>Psychological Impact</b>                                                                                                                        |                                  |                                  |
| 17. How anxious or self-conscious did you feel because of problems with your mouth, teeth, gums or dentures?                                       | .566                             | .698                             |
